# Supplementary material
Source: MDPI journal article supplement (https://www.mdpi.com/2073-4433/13/4/528)
Supplement: s1 [file s1 › atmosphere-1596595-SM.pdf]

## Supplementary Materials:

Lynsey Karen Parker, Jeremiah Johnson, John Grant, Pradeepa Vennam, Rajashi Parikh, Chao-Jung Chien and Ralph Morris \*

### Section S1. WRF Details

This section provides additional WRF details. WRF physics options are shown in Table S1-1. WRF performance benchmarks are provided in Table S1-2. The WRF model performance was typical for a good WRF application. The upper air temperature at the 850 mb pressure level (T850 mb) was evaluated against observed upper-air soundings from San Diego (Marine Corps Air Station Miramar; KNKX) and the Vandenberg Air Force Base (KVGB) and performance was good. When averaged across all sites in the SoCAB the WRF monthly surface meteorological performance met the most stringent simple model performance benchmarks except for temperature bias that fell between the simple and complex benchmarks. The WRF surface performance at some individual sites was not as good although it usually met the complex benchmarks and frequently met the simple benchmarks. , , and WRF surface model performance plots for five sites within the basin: KLAX, KLGB, KSNA, KONT, KSBD, are shown in Figures S1-S5. Table S1-3 presents monthly mean bias and error of T805 mb for two upper air sites in the region KNKX and KVGB.

**Table S1-1.** WRF physics options used in the SoCAB 12-km and 4-km modeling

| WRF Physics Option         | Option Selected                  | Notes                                                                                                                                          |
|----------------------------|----------------------------------|------------------------------------------------------------------------------------------------------------------------------------------------|
| Vertical Coordinate System | Hybrid Sigma-Pressure            | Hybrid Sigma-Pressure coordinate (Park et al., 2019)                                                                                           |
| Microphysics               | WRF Single-Moment 6-class (WSM6) | A scheme with ice, snow and graupel processes suitable for high-resolution simulations.                                                        |
| Longwave Radiation         | RRTMG                            | Rapid Radiative Transfer Model. An accurate scheme using look-up tables for efficiency. Accounts for multiple bands, and microphysics species. |
| Shortwave Radiation        | RRTMG                            | Rapid Radiative Transfer Model. An accurate scheme using look-up tables for efficiency. Accounts for multiple bands, and microphysics species. |
| Surface Layer Physics      | MM5 similarity                   | Based on Monin-Obukhov with Carlsoln-Boland viscous sub-layer and standard similarity functions from look-up tables                            |
| LSM                        | Noah                             | NCEP/NCAR land surface model with soil temperature and moisture in four layers, fractional snow cover and frozen soil physics.                 |
| PBL scheme                 | Yonsei University (YSU)          | Non-local-K scheme with explicit entrainment layer and parabolic K profile in unstable mixed layer                                             |
| Cumulus parameterization   | MSKF WRF                         | Multi-Scale Kain-Fritsch (MSKF) cumulus parameterization includes feedback of subgrid cloud information to the radiation schemes.              |

**Table S1-2.** WRF Model Performance Benchmarks.

| Parameter         | Emery et al. (2001) | Kemball-Cook et al. (2005) | McNally (2009)   |
|-------------------|---------------------|----------------------------|------------------|
| Conditions        | Simple              | Complex                    | Complex          |
| Temperature Bias  | $\leq \pm 0.5$ K    | $\leq \pm 2.0$ K           | $\leq \pm 1.0$ K |
| Temperature Error | $\leq 2.0$ K        | $\leq 3.5$ K               | $\leq 3.0$ K     |

| Parameter       | Emery et al. (2001)   | Kemball-Cook et al. (2005) | McNally (2009)      |
|-----------------|-----------------------|----------------------------|---------------------|
| Humidity Bias   | $\leq \pm 0.8$ g/kg   | $\leq \pm 1.0$ g/kg        | $\leq \pm 1.0$ g/kg |
| Humidity Error  | $\leq 2.0$ g/kg       | $\leq 2.0$ g/kg            | $\leq 2.0$ g/kg     |
| Wind Speed Bias | $\leq \pm 0.5$ m/s    | $\leq \pm 1.5$ m/s         | (not addressed)     |
| Wind Speed RMSE | $\leq 2.0$ m/s        | $\leq 2.5$ m/s             | (not addressed)     |
| Wind Dir. Bias  | $\leq \pm 10$ degrees | (not addressed)            | (not addressed)     |
| Wind Dir. Error | $\leq 30$ degrees     | $\leq 55$ degrees          | (not addressed)     |

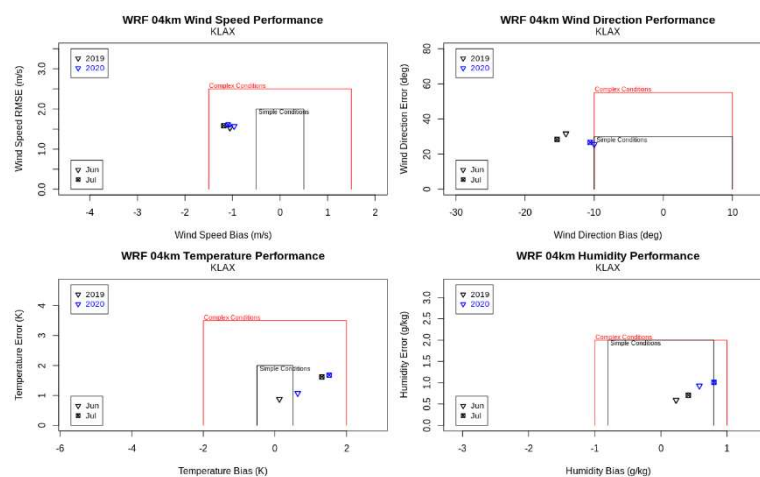

Figure S1-1. WRF MPE for KLAX.

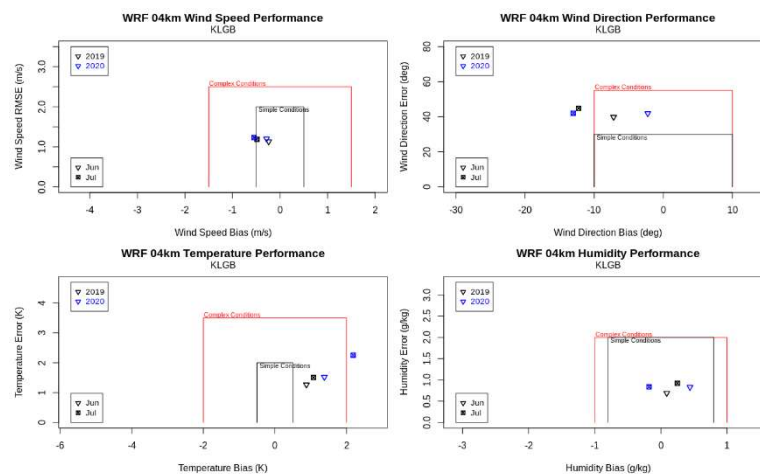

Figure S1-2. WRF MPE for KLGB.

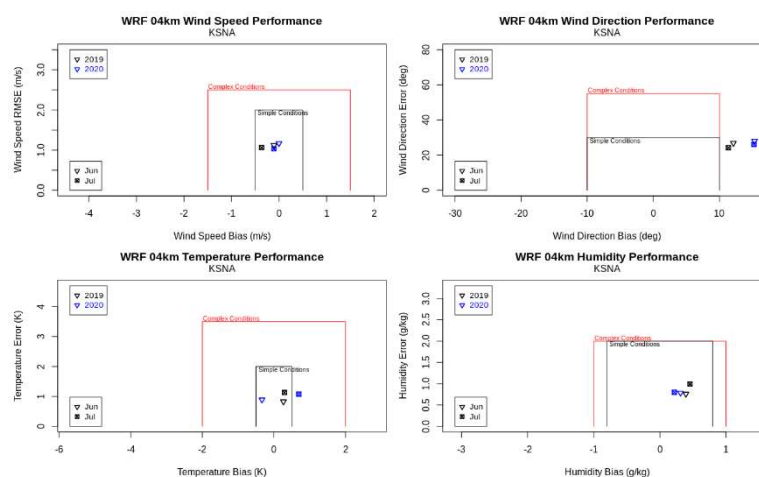

Figure S1-3. WFR MPE for KSNA.

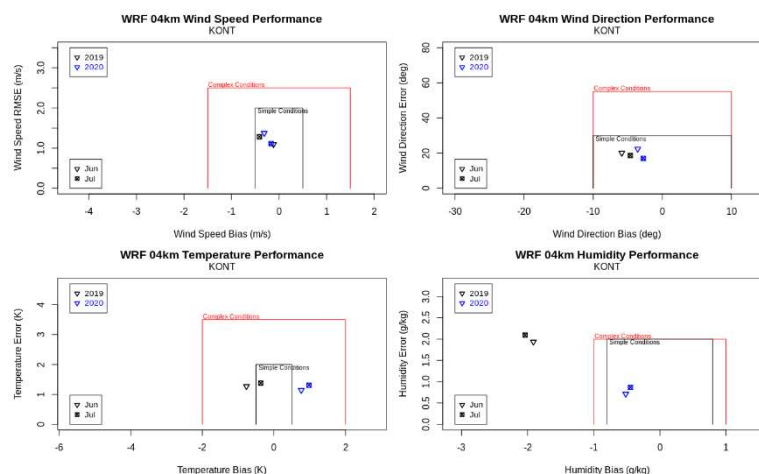

Figure S1-4. WFR MPE for KONT.

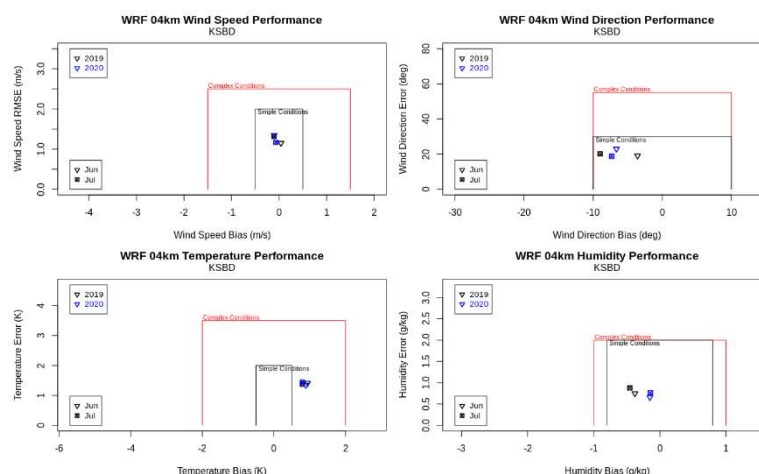

Figure S1-5. WFR MPE for KSBD.

Table S1-3. WFR T850 monthly mean bias (MB) and mean error (ME) at KNKX and KVBG for June and July for 2019 and 2020.

| Station | June 2019  |            | July 2019  |            | June 2020  |            | July 2020  |            |
|---------|------------|------------|------------|------------|------------|------------|------------|------------|
|         | MB<br>(°C) | ME<br>(°C) | MB<br>(°C) | ME<br>(°C) | MB<br>(°C) | ME<br>(°C) | MB<br>(°C) | ME<br>(°C) |

|      |       |      |       |      |       |      |       |      |
|------|-------|------|-------|------|-------|------|-------|------|
| KNKX | -0.70 | 0.87 | -0.06 | 0.41 | -0.16 | 0.75 | 0.04  | 0.51 |
| KVBG | -0.24 | 0.59 | 0.04  | 0.46 | 0.21  | 0.84 | -0.11 | 0.51 |

## Section S2. CMAQ options table

**Table S2-1.** CMAQ CCTM build science options and runscript options.

| Science Module/Option                     | Option                |
|-------------------------------------------|-----------------------|
| Horizontal advection                      | Yamo                  |
| Vertical advection                        | wrf                   |
| Horizontal Diffusion                      | Multiscale            |
| Vertical Diffusion                        | Acm2                  |
| Deposition Velocity                       | M3dry                 |
| Photolysis                                | Inline                |
| Chemistry Mechanism                       | saprc07tc_ae6_aq      |
| Aerosol Chemistry                         | Aero6                 |
| Cloud Chemistry                           | Acm_ae6               |
| Gas Phase Chemistry Solver                | Euler backward solver |
| Potential vorticity from free troposphere | Pv_O3                 |
| Inline wind blown dust                    | N                     |
| Lightning NOx                             | N                     |
| KZMIN (minimum Kz option)                 | Y                     |
| Ammonia bidirectional flux                | N                     |
| Mercury bidirectional flux                | N                     |
| Surface HONO interaction                  | Y                     |

## Section S3. Sector specific scaling factors and references and additional emissions onroad methodology

We developed adjustment factors to scale the BAU 2020 ARB emission inventory to actual activity and emission levels for the June-July 2020 period in the SoCAB region, to the extent feasible. The spatial and geographical specificity of the COVID-19 adjustment factors was determined by the extent to which applicable data was readily available for specific counties and months of interest. In certain instances, readily available data was limited to annualized and/or statewide activity.

The adjustment factors were developed for source categories shown in Table S3-1. Adjustment factors were applied to criteria air pollutants to adjust June and July 2020 emissions for all counties in the SoCAB 4-km modeling domain. Adjustment factors for each source category were cross-referenced to emission inventory source classification codes (SCC) to adjust the SCC-level ARB 2020 emission inventory. COVID-adjusted SCC-level emissions were then aggregated to the sector-level and sector-level COVID adjustment factors were estimated for application to model-ready emissions based on the ratio of COVID-adjusted to COVID-unadjusted sector-level emissions. **Error! Reference source not found.** provides detailed information on the basis and temporal and geographical coverage of the adjustment factors. Consumer product VOC emissions were estimated to go up 11% due to implementation of the 2020 COVID shelter-in-place orders due to COVID, which makes sense given people are at home more often under the 2020 COVID case than 2020 BAU case. Construction activity is down 5% that is consistent with the essential services coming back by June-July 2020. However, passenger rail activity is down approximately 50% due to COVID with freight rail down 20% and Los Angeles airport activity down 30%. Ocean Going Vessel (OGV) activity is down 6% to 73% depending on the type of OGV with the largest reduction for OGV passenger ships (e.g., cruise ships). Commercial heating/cooking is down ~10% and residential cooking/heating is up ~10% due to COVID.

Based mainly on reductions in gasoline and diesel sales between 2019 and 2020, the source sector that produced the largest emission reductions in June–July 2020 due to the COVID shelter-in-place orders was on-road mobile sources with a ~20% reduction.

The sector with the largest NO<sub>x</sub> reductions is onroad and the primary data source used to derive the onroad scaling factor was the U.S. Energy Information Administration (EIA) refinery gasoline and diesel sales in California. Vehicle miles traveled (VMT) for June and July 2020 during COVID were derived using ARB's Emission FACTor (EMFAC) tool and the product of EMFAC 2019 average summer day VMT and the ratio of 2020 to 2019 EIA fuel sales volumes for June–July. EIA 2020/2019 fuel sale ratios were 77 % for gasoline and 84 % for diesel. We derived 2020 emissions factors by fuel type and vehicle type for the 2020 vehicle fleet with EMFAC and multiplied those by the 2020 COVID VMT to derive 2020 COVID onroad emissions. 2020 BAU onroad emissions were generated by interpolating 2019 and 2021 EMFAC onroad emissions since 2019 and 2021 were assumed not to be impacted by COVID in EMFAC. The ratio of 2020 COVID to 2020 BAU onroad emissions was the scaling factor that was applied uniformly to the model-ready ARB onroad emissions.

Table S3-1. Sector Specific Emissions scaling factors.

| Source Category <sup>a</sup> | Region          | Pollutant | Metric                                                            | Temporal                     | Adjustment Factor | Adjustment Factor Basis                                                                    | Data Source                                                                                                                                                                                                                                                                                                                                                                                                                                                                                                                                                                                                                                                                                                                                                                                                                                                                                                                                                                                           |
|------------------------------|-----------------|-----------|-------------------------------------------------------------------|------------------------------|-------------------|--------------------------------------------------------------------------------------------|-------------------------------------------------------------------------------------------------------------------------------------------------------------------------------------------------------------------------------------------------------------------------------------------------------------------------------------------------------------------------------------------------------------------------------------------------------------------------------------------------------------------------------------------------------------------------------------------------------------------------------------------------------------------------------------------------------------------------------------------------------------------------------------------------------------------------------------------------------------------------------------------------------------------------------------------------------------------------------------------------------|
| Consumer Products            | Nationwide      | All       | Product sales, product production and household expenditures data | Episode Period (June - July) | 1.105             | Ratio of 2020 to 2019 production and household expenditures for the month of June and July | <p>NielsenIQ Reporting:<br/> <a href="https://nielseniq.com/global/en/insights/analysis/2021/which-pandemic-inspired-purchasing-shifts-are-here-to-stay/">https://nielseniq.com/global/en/insights/analysis/2021/which-pandemic-inspired-purchasing-shifts-are-here-to-stay/</a></p> <p>Media Reports:<br/> <a href="https://www.nature.com/articles/d41586-021-00251-4">https://www.nature.com/articles/d41586-021-00251-4</a></p> <p><a href="https://www.perioimplantadvisory.com/clinical-tips/article/14206274/the-dangers-of-hand-sanitizer-use-and-misuse">https://www.perioimplantadvisory.com/clinical-tips/article/14206274/the-dangers-of-hand-sanitizer-use-and-misuse</a></p> <p>Industry Report:<br/> <a href="https://www.cleaninginstitute.org/covid19report">https://www.cleaninginstitute.org/covid19report</a></p> <p>Consumer Expenditure Government Report:<br/> <a href="https://www.bls.gov/news.release/cesan.nr0.htm">https://www.bls.gov/news.release/cesan.nr0.htm</a></p> |
| Construction Equipment       | California-wide | All       | All Employees: Construction in California                         | Episode Period (June - July) | 0.952             | Ratio of total employees in 2020 to 2019 for the month June and July                       | <a href="https://fred.stlouisfed.org/series/CACONS">https://fred.stlouisfed.org/series/CACONS</a>                                                                                                                                                                                                                                                                                                                                                                                                                                                                                                                                                                                                                                                                                                                                                                                                                                                                                                     |

| Source Category <sup>a</sup>                | Region                | Pollutant | Metric                            | Temporal                        | Adjustment Factor | Adjustment Factor Basis                                                                                           | Data Source                                                                                                                                                                                                                                                                                                                      |
|---------------------------------------------|-----------------------|-----------|-----------------------------------|---------------------------------|-------------------|-------------------------------------------------------------------------------------------------------------------|----------------------------------------------------------------------------------------------------------------------------------------------------------------------------------------------------------------------------------------------------------------------------------------------------------------------------------|
| Passenger Rail                              | Los Angeles County    | All       | Total Passenger Miles             | Episode Period<br>(June - July) | 0.497             | Ratio of total passenger miles in 2020 to 2019 for the month June and July                                        | <a href="https://isotp.metro.net/MetroRidership/Index.aspx">https://isotp.metro.net/MetroRidership/Index.aspx</a>                                                                                                                                                                                                                |
| Freight Rail                                | Nationwide            | All       | Total Train Miles                 | Episode Period<br>(June - July) | 0.802             | Ratio of total train miles in 2020 to 2019 for the month June and July                                            | <a href="https://safetydata.fra.dot.gov/OfficeofSafety/publicsite/Query/rrstab.aspx">https://safetydata.fra.dot.gov/OfficeofSafety/publicsite/Query/rrstab.aspx</a>                                                                                                                                                              |
| Aircraft                                    | Los Angeles County    | All       | Total Operation                   | Episode Period<br>(June - July) | 0.702             | Ratio of total operations in 2020 to 2019 for the month of June and July                                          | <a href="https://aspm.faa.gov/opsnet/sys/main.asp">https://aspm.faa.gov/opsnet/sys/main.asp</a>                                                                                                                                                                                                                                  |
|                                             | San Bernardino County |           |                                   |                                 | 0.780             |                                                                                                                   |                                                                                                                                                                                                                                                                                                                                  |
|                                             | Riverside County      |           |                                   |                                 | 0.803             |                                                                                                                   |                                                                                                                                                                                                                                                                                                                                  |
|                                             | Orange County         |           |                                   |                                 | 0.853             |                                                                                                                   |                                                                                                                                                                                                                                                                                                                                  |
|                                             | SoCAB                 | All       | Total Operation                   | Episode Period<br>(June - July) | 0.739             |                                                                                                                   |                                                                                                                                                                                                                                                                                                                                  |
| Ocean Going Vessels (OGV) - Container Ships | SoCAB                 | All       | Twenty-foot Equivalent Unit (TEU) | Episode Period<br>(June - July) | 0.976             | Ratio of total TEU in 2020 to 2019 (Port of Los Angeles (LA) and Long Beach (LB)) for the months of June and July | Port of LA:<br><a href="https://www.portoflosangeles.org/business/statistics/facts-and-figures">https://www.portoflosangeles.org/business/statistics/facts-and-figures</a><br>Port of LB:<br><a href="https://polb.com/business/port-statistics/#tonnage-summary">https://polb.com/business/port-statistics/#tonnage-summary</a> |

| Source Category <sup>a</sup>                           | Region          | Pollutant | Metric              | Temporal                        | Adjustment Factor | Adjustment Factor Basis                                                                  | Data Source                                                                                                                                                                                                                                                                                                                                                                                                                                                                                                                                                  |
|--------------------------------------------------------|-----------------|-----------|---------------------|---------------------------------|-------------------|------------------------------------------------------------------------------------------|--------------------------------------------------------------------------------------------------------------------------------------------------------------------------------------------------------------------------------------------------------------------------------------------------------------------------------------------------------------------------------------------------------------------------------------------------------------------------------------------------------------------------------------------------------------|
| OGV - Tankers                                          | California-wide | All       | Crude Oil Imports   | Episode Period<br>(June - July) | 0.698             | Total crude import ratio in California from 2020 to 2019 for the months of June and July | 2020:<br><a href="https://www.energy.ca.gov/data-reports/energy-almanac/californias-petroleum-market/foreign-sources-crude-oil-imports/2020">https://www.energy.ca.gov/data-reports/energy-almanac/californias-petroleum-market/foreign-sources-crude-oil-imports/2020</a><br>2019:<br><a href="https://www.energy.ca.gov/data-reports/energy-almanac/californias-petroleum-market/foreign-sources-crude-oil-imports/2019-0">https://www.energy.ca.gov/data-reports/energy-almanac/californias-petroleum-market/foreign-sources-crude-oil-imports/2019-0</a> |
| OGV - Auto Carriers/Roll On-Roll off Vessels           | SoCAB           | All       | Automobiles (Units) | Annual                          | 0.814             | Ratio of annual automobile units (import and export) in 2020 to 2019 for the Port of LA  | <a href="https://www.portoflosangeles.org/business/statistics/automobile-statistics">https://www.portoflosangeles.org/business/statistics/automobile-statistics</a>                                                                                                                                                                                                                                                                                                                                                                                          |
| OGV - Bulk Cargo, Refrigerated Cargo and General Cargo | SoCAB           | All       | Metric Revenue Tons | Annual                          | 0.941             | Ratio of annual Toonage in 2020 to 2019 for the Port of LA and Port of LB                | POLA: <a href="https://www.portoflosangeles.org/business/statistics/facts-and-figures">https://www.portoflosangeles.org/business/statistics/facts-and-figures</a><br>POLB: <a href="https://polb.com/business/port-statistics/#tonnage-summary">https://polb.com/business/port-statistics/#tonnage-summary</a>                                                                                                                                                                                                                                               |
| OGV - Passenger Ships                                  | SoCAB           | All       | Cruise Ship Calls   | Annual                          | 0.274             | Ratio of annual cruise ship calls in 2020 to 2019 for the Port of LA                     | <a href="https://www.portoflosangeles.org/business/statistics/automobile-statistics">https://www.portoflosangeles.org/business/statistics/automobile-statistics</a>                                                                                                                                                                                                                                                                                                                                                                                          |

| Source Category <sup>a</sup>                 | Region                | Pollutant | Metric                                                                                              | Temporal                                   | Adjustment Factor | Adjustment Factor Basis                                                                | Data Source                                                                                                                                                                                                                                                                                                                |
|----------------------------------------------|-----------------------|-----------|-----------------------------------------------------------------------------------------------------|--------------------------------------------|-------------------|----------------------------------------------------------------------------------------|----------------------------------------------------------------------------------------------------------------------------------------------------------------------------------------------------------------------------------------------------------------------------------------------------------------------------|
| Cargo Handling Equipment (Port and Railyard) | SoCAB                 | All       | Container Volume (TEU)                                                                              | Episode Period (June - July)               | 0.976             | Ratio of total TEU in 2020 to 2019 (Port of LA and LB) for the months of June and July | Port of LA: <a href="https://www.portoflosangeles.org/business/statistics/facts-and-figures">https://www.portoflosangeles.org/business/statistics/facts-and-figures</a><br>Port of LB: <a href="https://polb.com/business/port-statistics/#tonnage-summary">https://polb.com/business/port-statistics/#tonnage-summary</a> |
| Commercial Cooking and Heating               | Los Angeles County    | All       | Google Mobility Trend (Average of Rail and Recreation, Grocery and Pharmacy and Workplace sectors ) | 2020 percent change from baseline activity | 0.893             | 2020 percent change from baseline activity                                             | <a href="https://www.gstatic.com/covid19/mobility/2020-05-09_US_California_Mobility_Report_en.pdf">https://www.gstatic.com/covid19/mobility/2020-05-09_US_California_Mobility_Report_en.pdf</a>                                                                                                                            |
|                                              | San Bernardino County |           |                                                                                                     |                                            | 0.950             |                                                                                        |                                                                                                                                                                                                                                                                                                                            |
|                                              | Orange County         |           |                                                                                                     |                                            | 0.910             |                                                                                        |                                                                                                                                                                                                                                                                                                                            |
|                                              | Riverside County      |           |                                                                                                     |                                            | 0.940             |                                                                                        |                                                                                                                                                                                                                                                                                                                            |
|                                              | SoCAB                 |           |                                                                                                     |                                            | 0.910             |                                                                                        |                                                                                                                                                                                                                                                                                                                            |
| Residential Cooking and Heating              | Los Angeles County    | All       | Google Mobility Trend (Residential)                                                                 | 2020 percent change from baseline activity | 1.140             | 2020 percent change from baseline activity                                             | <a href="https://www.gstatic.com/covid19/mobility/2020-05-09_US_California_Mobility_Report_en.pdf">https://www.gstatic.com/covid19/mobility/2020-05-09_US_California_Mobility_Report_en.pdf</a>                                                                                                                            |
|                                              | San Bernardino County |           |                                                                                                     |                                            | 1.100             |                                                                                        |                                                                                                                                                                                                                                                                                                                            |
|                                              | Orange County         |           |                                                                                                     |                                            | 1.140             |                                                                                        |                                                                                                                                                                                                                                                                                                                            |

| Source Category <sup>a</sup>   | Region                | Pollutant                                    | Metric                                                                | Temporal                     | Adjustment Factor | Adjustment Factor Basis                                                               | Data Source                                                                                                                     |
|--------------------------------|-----------------------|----------------------------------------------|-----------------------------------------------------------------------|------------------------------|-------------------|---------------------------------------------------------------------------------------|---------------------------------------------------------------------------------------------------------------------------------|
|                                | Riverside County      |                                              |                                                                       |                              | 1.110             |                                                                                       |                                                                                                                                 |
| Refinery                       | California-wide       | All                                          | Weekly West Coast (PADD 5 <sup>1</sup> ) Gross Inputs into Refineries | Episode Period (June - July) | 0.708             | Based on ratio of average daily input in 2020 to 2019 for the months of June and July | <a href="https://www.eia.gov/dnav/pet/pet_sum_sndw_dcus_r50_w.htm">https://www.eia.gov/dnav/pet/pet_sum_sndw_dcus_r50_w.htm</a> |
| Electric Generation Unit (EGU) | Los Angeles County    | All except SO <sub>2</sub> <sup>2</sup>      | NO <sub>x</sub> Error! Bookmark not defined. emissions                | Episode Period (June - July) | 0.802             | Based on ratio of emissions in 2020 to 2019 for the months of June and July           | <a href="https://ampd.epa.gov/ampd/">https://ampd.epa.gov/ampd/</a>                                                             |
|                                | Orange County         |                                              |                                                                       |                              | 2.415             |                                                                                       |                                                                                                                                 |
|                                | Riverside County      |                                              |                                                                       |                              | 1.014             |                                                                                       |                                                                                                                                 |
|                                | San Bernardino County |                                              |                                                                       |                              | 1.004             |                                                                                       |                                                                                                                                 |
|                                | Los Angeles County    | SO <sub>2</sub> Error! Bookmark not defined. | SO <sub>2</sub> Error! Bookmark not defined. emissions                | Episode Period (June - July) | 0.960             |                                                                                       |                                                                                                                                 |
|                                | Orange County         |                                              |                                                                       |                              | 2.822             |                                                                                       |                                                                                                                                 |
|                                | Riverside County      |                                              |                                                                       |                              | 1.036             |                                                                                       |                                                                                                                                 |

<sup>1</sup> PADD: Petroleum Administration for Defense Districts

<sup>2</sup> SO<sub>2</sub>: sulfur dioxide; NO<sub>x</sub>: nitrogen dioxide; PM<sub>2.5</sub>: particulate matter (PM) 2.5; PM<sub>10</sub>: particulate matter 10; TOG: total organic gas; CO: carbon dioxide; NH<sub>3</sub>: ammonia

| Source Category <sup>a</sup> | Region                | Pollutant                                                    | Metric                                     | Temporal   | Adjustment Factor | Adjustment Factor Basis                                                                                                                                                                                                                                                                                                                                                                                                                                                                                                                                                                                 | Data Source                                                                                                                                                                                                                                                                                                                                                                                                                                                                                                                                                                                                   |
|------------------------------|-----------------------|--------------------------------------------------------------|--------------------------------------------|------------|-------------------|---------------------------------------------------------------------------------------------------------------------------------------------------------------------------------------------------------------------------------------------------------------------------------------------------------------------------------------------------------------------------------------------------------------------------------------------------------------------------------------------------------------------------------------------------------------------------------------------------------|---------------------------------------------------------------------------------------------------------------------------------------------------------------------------------------------------------------------------------------------------------------------------------------------------------------------------------------------------------------------------------------------------------------------------------------------------------------------------------------------------------------------------------------------------------------------------------------------------------------|
|                              | San Bernardino County |                                                              |                                            |            | 1.011             |                                                                                                                                                                                                                                                                                                                                                                                                                                                                                                                                                                                                         |                                                                                                                                                                                                                                                                                                                                                                                                                                                                                                                                                                                                               |
| On-road                      | SoCAB                 | NO <sub>x</sub> <sup>Error!</sup><br>Bookmark not defined.   | Emissions and Vehicle Miles Traveled (VMT) | Summer Day | 0.794             | 1) Estimated June-July 2020 VMT with COVID-19 impacts based on the product of EMFAC 2019 average summer day VMT and the ratio of 2020 to 2019 EIA fuel sales volumes for June-July.<br>2) Estimated 2020 EMFAC emissions per mile by fuel type for each vehicle classification.<br>3) Estimated 2020 COVID emissions based on the product of #1 and #2 above.<br>4) EMFAC includes annualized COVID adjustments for calendar year 2020. We estimated a 2020 COVID unadjusted emission inventory by interpolating EMFAC 2019 and 2021 emissions, which are assumed not to be impacted by COVID in EMFAC. | EMFAC2021 v1.0.1:<br><a href="https://arb.ca.gov/emfac/emissions-inventory/b8cfe2a8a4b5424be91e8e14748e8fde1de999c1">https://arb.ca.gov/emfac/emissions-inventory/b8cfe2a8a4b5424be91e8e14748e8fde1de999c1</a><br>EIA Gasoline:<br><a href="https://www.eia.gov/dnav/pet/hist/LeafHandler.ashx?n=PET&amp;s=A103650061&amp;f=M">https://www.eia.gov/dnav/pet/hist/LeafHandler.ashx?n=PET&amp;s=A103650061&amp;f=M</a> EIA<br>Diesel :<br><a href="https://www.eia.gov/dnav/pet/pet_cons_reform_th_c_SCA_EPD2DXL0_mgalpd_m.htm">https://www.eia.gov/dnav/pet/pet_cons_reform_th_c_SCA_EPD2DXL0_mgalpd_m.htm</a> |
|                              |                       | PM <sub>2.5</sub> <sup>Error!</sup><br>Bookmark not defined. |                                            |            | 0.787             |                                                                                                                                                                                                                                                                                                                                                                                                                                                                                                                                                                                                         |                                                                                                                                                                                                                                                                                                                                                                                                                                                                                                                                                                                                               |
|                              |                       | PM <sub>10</sub> <sup>Error!</sup><br>Bookmark not defined.  |                                            |            | 0.784             |                                                                                                                                                                                                                                                                                                                                                                                                                                                                                                                                                                                                         |                                                                                                                                                                                                                                                                                                                                                                                                                                                                                                                                                                                                               |
|                              |                       | TOG <sup>Error!</sup><br>Bookmark not defined.               |                                            |            | 0.776             |                                                                                                                                                                                                                                                                                                                                                                                                                                                                                                                                                                                                         |                                                                                                                                                                                                                                                                                                                                                                                                                                                                                                                                                                                                               |
|                              |                       | CO <sup>Error!</sup>                                         |                                            |            | 0.776             |                                                                                                                                                                                                                                                                                                                                                                                                                                                                                                                                                                                                         |                                                                                                                                                                                                                                                                                                                                                                                                                                                                                                                                                                                                               |

| Source Category <sup>a</sup> | Region | Pollutant                                       | Metric | Temporal | Adjustment Factor | Adjustment Factor Basis                                                                 | Data Source |
|------------------------------|--------|-------------------------------------------------|--------|----------|-------------------|-----------------------------------------------------------------------------------------|-------------|
|                              |        | Bookmark not defined.                           |        |          |                   | 5) The on-road adjustment factor was estimated based on the product of #3 and #4 above. |             |
|                              |        | SO <sub>2</sub> Error!<br>Bookmark not defined. |        |          | 0.776             |                                                                                         |             |

## Section S4. Additional CMAQ MPE.

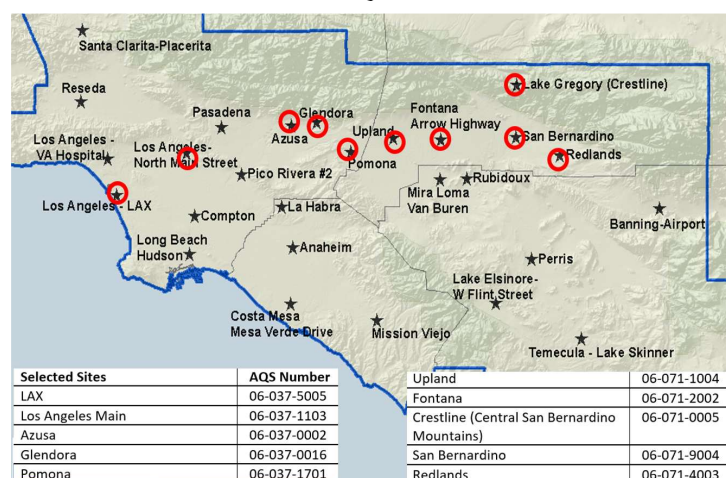

Figure S4-1. Map of SoCAB sites, and list of selected sites.

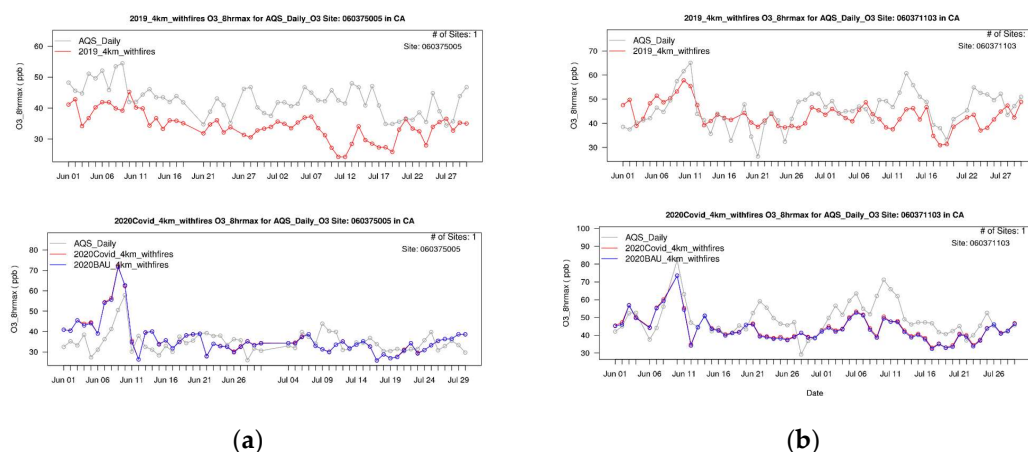

Figure S4-2. June 1 – July 31 MDA8 ozone time series plots. Upper plots are 2019 Base and lower plots are 2020 BAU and 2020 COVID: (a) LAX (AQS = 06037-5005); (b) Los Angeles Main (AQS = 06037-1103).

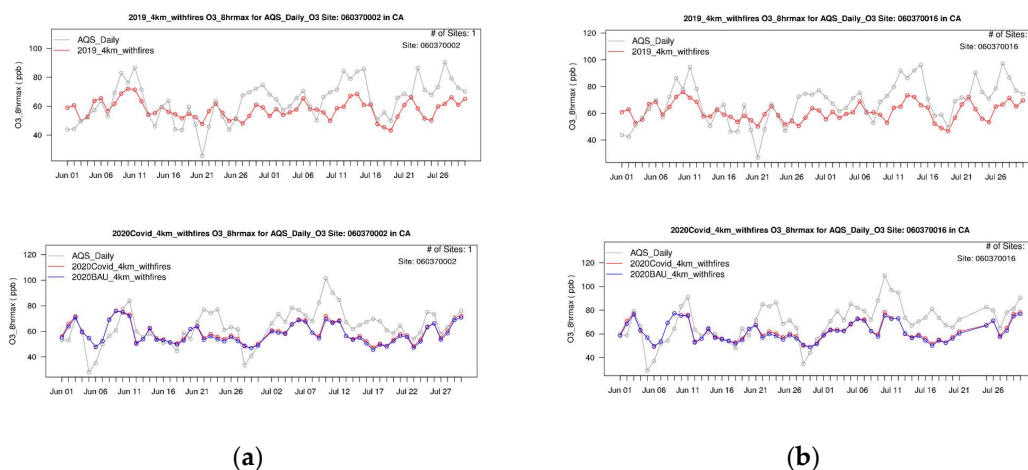

Figure S4-3. June 1 – July 31 MDA8 ozone time series plots. Upper plots are 2019 Base and lower plots are 2020 BAU and 2020 COVID: (a) Azusa (AQS = 06037-0002); (b) Glendora (AQS = 06037-0016).

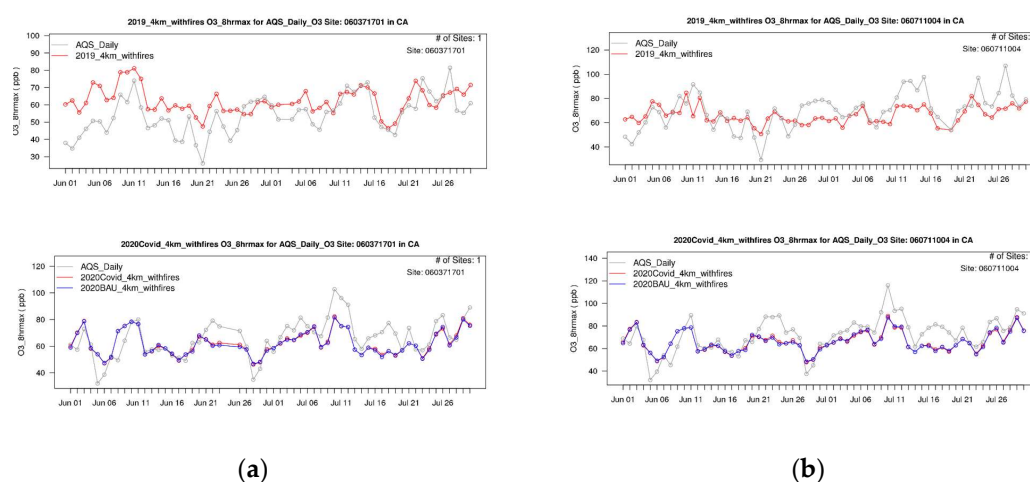

**Figure S4-4.** June 1 – July 31 MDA8 ozone time series plots. Upper plots are 2019 Base and lower plots are 2020 BAU and 2020 COVID: (a) Pomona (AQ5 = 06037-1701); (b) Upland (AQ5 = 06071-1004).

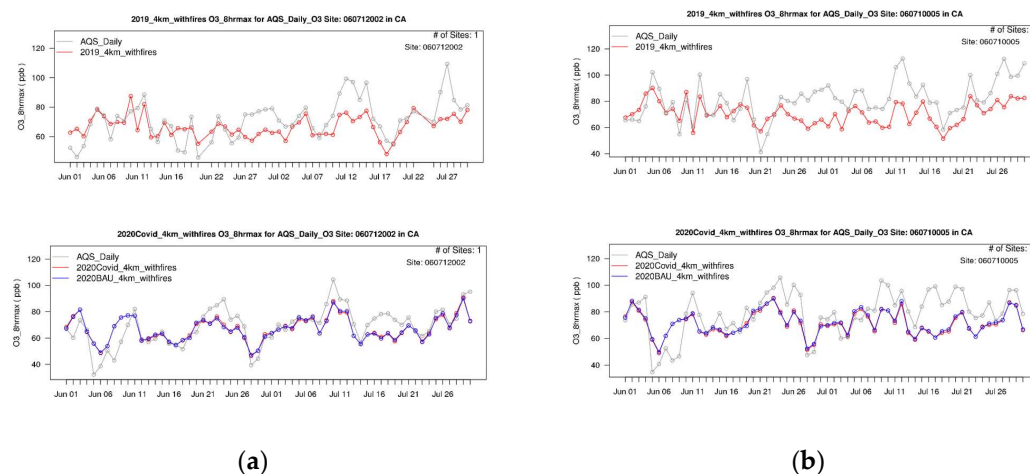

**Figure S4-5.** June 1 – July 31 MDA8 ozone time series plots. Upper plots are 2019 Base and lower plots are 2020 BAU and 2020 COVID: (a) Fontana (AQ5 = 06071-2002); (b) Crestline (AQ5 = 06071-0005).

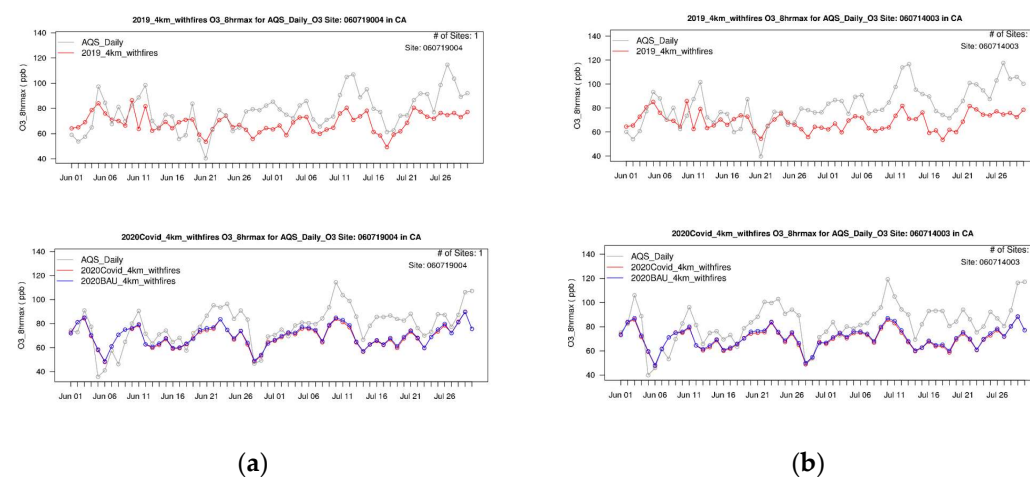

**Figure S4-6.** June 1 – July 31 MDA8 ozone time series plots. Upper plots are 2019 Base and lower plots are 2020 BAU and 2020 COVID: (a) San Bernardino (AQ5 = 06071-9004); (b) Redlands (AQ5 = 06071-4003).

**Table S4-1.** Selected site MPE performance statistics for June and July. Green indicates that a monitor's statistics meets performance goals, brown indicates that a monitor's statistics meets performance criteria, and red indicates that a monitor's statistics do not meet performance criteria.

|      |                | ----- 2019 ----- |              |              |       |      |      | ----- 2020 COVID ----- |              |       |      |      |
|------|----------------|------------------|--------------|--------------|-------|------|------|------------------------|--------------|-------|------|------|
|      | Monitor        | AQS              | Obs.<br>Mean | Mod.<br>Mean | NMB   | NME  | COR  | Obs.<br>Mean           | Mod.<br>Mean | NMB   | NME  | COR  |
| June | LAX            | 603750051        | 44.4         | 36.7         | -17.3 | 17.9 | 0.45 | 35.4                   | 39.6         | 11.7  | 20.0 | 0.62 |
|      | L .A. Main     | 603711031        | 44.0         | 44.6         | 1.3   | 11.4 | 0.69 | 47.7                   | 45.6         | -4.5  | 12.3 | 0.67 |
|      | Azusa          | 603700021        | 57.9         | 57.6         | -0.6  | 14.1 | 0.70 | 57.4                   | 57.9         | 0.9   | 14.3 | 0.58 |
|      | Glendora       | 603700161        | 61.2         | 60.4         | -1.3  | 14.2 | 0.68 | 62.1                   | 60.5         | -2.5  | 15.0 | 0.60 |
|      | Pomona         | 603717011        | 49.7         | 62.2         | 25.1  | 27.2 | 0.64 | 59.1                   | 60.4         | 2.2   | 11.3 | 0.70 |
|      | Upland         | 607110042        | 63.2         | 65.0         | 2.8   | 15.6 | 0.55 | 64.8                   | 63.7         | -1.7  | 12.9 | 0.72 |
|      | Fontana        | 607120021        | 66.1         | 66.4         | 0.4   | 12.5 | 0.51 | 62.3                   | 64.6         | 3.7   | 12.2 | 0.72 |
|      | Crestline      | 607100051        | 75.5         | 71.2         | -5.7  | 12.8 | 0.58 | 73.9                   | 71.0         | -3.9  | 14.5 | 0.76 |
|      | San Bernardino | 607190041        | 71.4         | 68.2         | -4.5  | 13.7 | 0.52 | 71.5                   | 67.5         | -5.6  | 13.6 | 0.76 |
|      | Redlands       | 607140031        | 72.4         | 68.8         | -4.9  | 12.9 | 0.49 | 76.9                   | 68.6         | -10.8 | 14.9 | 0.78 |
| July | LAX            | 603750051        | 41.0         | 32.1         | -21.8 | 22.2 | 0.06 | 34.3                   | 33.2         | -3.2  | 11.4 | 0.09 |
|      | L. A. Main     | 603711031        | 47.6         | 42.0         | -11.8 | 13.2 | 0.51 | 49.9                   | 42.4         | -15.1 | 15.8 | 0.69 |
|      | Azusa          | 603700021        | 68.9         | 57.7         | -16.2 | 17.0 | 0.59 | 70.0                   | 59.6         | -14.9 | 15.0 | 0.69 |
|      | Glendora       | 603700161        | 73.7         | 61.8         | -16.2 | 17.1 | 0.66 | 78.2                   | 64.3         | -17.8 | 17.8 | 0.72 |
|      | Pomona         | 603717011        | 59.1         | 62.6         | 5.9   | 11.0 | 0.65 | 72.6                   | 64.1         | -11.7 | 12.9 | 0.78 |
|      | Upland         | 607110042        | 76.5         | 67.5         | -11.7 | 12.9 | 0.69 | 79.1                   | 68.6         | -13.3 | 13.4 | 0.82 |
|      | Fontana        | 607120021        | 77.1         | 67.4         | -12.6 | 13.1 | 0.74 | 75.6                   | 69.4         | -8.2  | 9.3  | 0.78 |
|      | Crestline      | 607100051        | 86.7         | 70.3         | -18.9 | 18.9 | 0.76 | 83.8                   | 71.6         | -14.5 | 16.4 | 0.45 |
|      | San Bernardino | 607190041        | 84.1         | 69.1         | -17.9 | 17.9 | 0.78 | 84.8                   | 71.1         | -16.2 | 16.4 | 0.69 |
|      | Redlands       | 607140031        | 91.1         | 69.3         | -23.9 | 23.9 | 0.75 | 88.9                   | 71.5         | -19.6 | 19.7 | 0.68 |
